# Supplementary material
Source: publisher site journal article supplement (https://www.dovepress.com/article/445382)
Supplement: Supplementary file 1 [file get_supplementary_file.php]

**Table S1** Genes list of pyroptosis related genes.

| Pyroptosis related genes |          |           |        |         |           |
|--------------------------|----------|-----------|--------|---------|-----------|
| Abl1                     | Gsdmc    | Prtn3     | Chmp6  | Mmp1a   | Tlr2      |
| Adora1                   | Gsdmc2   | Pstpip2   | Chmp7  | Mnda    | Tlr3      |
| Adora2a                  | Gsdmc3   | Pten      | Cited2 | Mndal   | Tlr4      |
| Adora2b                  | Gsdmc4   | Ptgs2     | Cnr1   | Mpeg1   | Tnf       |
| Adora3                   | Gsdmd    | Ptpn11    | Crtac1 | Mst1    | Tnfaip3   |
| Ager                     | Gsdme    | Ptx3      | Ctsg   | Naip2   | Tnfrsf11b |
| AI607873                 | Gsk3b    | Pycard    | Ctsl   | Ndufa13 | Tradd     |
| Aim2                     | Gzma     | Pydc3     | Cycs   | Nek7    | Traf2     |
| Ano6                     | Gzmb     | Pydc4     | Ddx3x  | Nfe2l2  | Traf3     |
| Anxa1                    | Hdac6    | Pyhin1    | Dhx9   | Nfkb1   | Traf6     |
| Apip                     | Hmgb1    | Rbbp4     | Dnmt1  | Ninj1   | Trem1     |
| Apoa1                    | Hsp90aa1 | Rbbp7     | Dnmt3a | Nlrc4   | Trem2     |
| Apoe                     | Htra1    | Rbck1     | Dnmt3b | Nlrp1b  | Trim21    |
| Atg5                     | Icam1    | Ripk1     | Dpp8   | Nlrp2   | Trim24    |
| Atp6ap1                  | Ifi203   | Ripk3     | Dpp9   | Nlrp3   | Trim25    |
| Bak1                     | Ifi204   | Rnf31     | Drd2   | Nlrp6   | Trim31    |
| Bax                      | Ifi205   | Rps27a    | Duox1  | Nlrp9b  | Trp53     |
| BC094916                 | Ifnb1    | Scaf11    | Eed    | Nlrx1   | Trp63     |
| Birc2                    | Ikbke    | Sdhb      | Eef2k  | Nod1    | Tslp      |
| Birc3                    | Ikzf1    | Serpinb1a | Elane  | Nod2    | Txnip     |
| Bnip3                    | Il17a    | Sesn2     | Elavl1 | Nr1h2   | Ubc       |
| Bsg                      | Il18     | Setd7     | Epha2  | Osm     | Ubr2      |
| Camp                     | Il1a     | Sez6l2    | Ets1   | P2rx7   | Ucp1      |
| Capn1                    | Il1b     | Siglec15  | Ezh2   | Pak2    | Ulk1      |
| Casp1                    | Il1f8    | Sirt1     | Fadd   | Parp1   | Usf2      |
| Casp3                    | Il1f9    | Slc16a4   | Fasl   | Pcsk9   | Usp14     |
| Casp4                    | Il6      | Slc30a7   | Fat1   | Pdcd6ip | Usp18     |

|        |              |        |         |        |        |
|--------|--------------|--------|---------|--------|--------|
| Casp6  | Irf1         | Smim1  | Fgf21   | Pecam1 | Usp25  |
| Casp7  | Irf2         | Snip1  | Fgf5    | Pgf    | Usp47  |
| Casp8  | Irf3         | Snrpn  | Fmr1    | Pif1   | Usp8   |
| Casp9  | Irf9         | Socs1  | Fndc4   | Pkm    | Usp9x  |
| Cd274  | Jun          | Sqstm1 | Fndc5   | Pkn2   | Uts2   |
| Cdc37  | Kif23        | Stat2  | Foxo3   | Plcg1  | Vcam1  |
| Cdk1   | LOC102639543 | Stat3  | Foxp3   | Pola1  | Vdr    |
| Cdk9   | Malt1        | Stk4   | Fpr2    | Pola2  | Vegfa  |
| Cebpb  | Mapk11       | Suz12  | Gbp5    | Pparg  | Vim    |
| Cep55  | Mapk14       | Syvn1  | Gja1    | Prdm1  | Vtn    |
| Chmp2a | Mefv         | Tcea3  | Gm10053 | Prf1   | Ythdf2 |
| Chmp2b | Mettl14      | Tet2   | Gm16340 | Prim1  | Ywhae  |
| Chmp3  | Mettl3       | Tfam   | Gm7866  | Prim2  | Ywhaz  |
| Chmp4b | Mki67        | Tfg    | Gpx4    | Prkaca | Zbp1   |
| Chmp4c | Mkl1         | Tirap  | Gsdma   | Prmt5  | Zdhhc1 |

**Table S2** GSEA analysis of GSE60670 dataset between NP and Control groups

| Description                                                                                                                 | Setsize | Enrichmentscore | NES   | p.adjust | qvalue |
|-----------------------------------------------------------------------------------------------------------------------------|---------|-----------------|-------|----------|--------|
| RUTELLA_RESPONSE_T<br>O_HGF_VS_CSF2RB_AN<br>D_IL4_UP                                                                        | 374     | 0.398           | 2.013 | 0.002    | 0.001  |
| LU_IL4_SIGNALING<br>WP_OVERVIEW_OF_PR<br>OINFLAMMATORY_AN<br>D_PROFIBROTIC_MEDIA<br>TORS                                    | 85      | 0.482           | 2.001 | 0.001    | 0.001  |
| RUTELLA_RESPONSE_T<br>O_CSF2RB_AND_IL4_DN                                                                                   | 287     | 0.403           | 1.983 | 0.001    | 0.002  |
| NEMETH_INFLAMMATO<br>RY_RESPONSE_LPS_UP<br>WP_CELLS_AND_MOLE<br>CULES_INVOLVED_IN_L<br>OCAL_ACUTE_INFLAM<br>MATORY_RESPONSE | 82      | 0.466           | 1.921 | 0.006    | 0.005  |
| WP_INFLAMMATORY_B                                                                                                           | 16      | 0.668           | 1.898 | 0.044    | 0.039  |
|                                                                                                                             | 40      | 0.530           | 1.892 | 0.023    | 0.020  |

|                                                        |     |       |       |       |       |
|--------------------------------------------------------|-----|-------|-------|-------|-------|
| OWEL_DISEASE_SIGNA<br>LING                             |     |       |       |       |       |
| FULCHER_INFLAMMAT<br>ORY_RESPONSE_LECTI<br>N_VS_LPS_DN | 382 | 0.370 | 1.873 | 0.002 | 0.001 |
| VILIMAS_NOTCH1_TAR<br>GETS_DN                          | 29  | 0.554 | 1.841 | 0.048 | 0.042 |
| HINATA_NFKB_TARGET<br>S_KERATINOCYTE_UP                | 80  | 0.442 | 1.813 | 0.011 | 0.010 |

**Table S3** GSEA analysis of GSE60670 dataset between high and low riskscore groups.

| Description                                                                                                                                   | Setsize | Enrichmentscore | NES   | p.adjust | qvalue |
|-----------------------------------------------------------------------------------------------------------------------------------------------|---------|-----------------|-------|----------|--------|
| REACTOME_REGULATION_OF_<br>TP53_EXPRESSION_AND_DEGR<br>ADATION                                                                                | 34      | 0.676           | 2.145 | 0.002    | 0.002  |
| REACTOME_PYROPTOSIS                                                                                                                           | 23      | 0.691           | 2.004 | 0.008    | 0.007  |
| REACTOME_REGULATION_OF_<br>TP53_ACTIVITY                                                                                                      | 147     | 0.477           | 1.951 | 0.001    | 0.001  |
| SCHOEN_NFKB_SIGNALING                                                                                                                         | 34      | 0.596           | 1.893 | 0.016    | 0.014  |
| REACTOME_REGULATION_OF_<br>TP53_ACTIVITY_THROUGH_PH<br>OSPHORYLATION                                                                          | 82      | 0.497           | 1.866 | 0.005    | 0.004  |
| RUTELLA_RESPONSE_TO_CSF2<br>RB_AND_IL4_UP                                                                                                     | 310     | 0.414           | 1.844 | 0.001    | 0.001  |
| HINATA_NFKB_TARGETS_KER<br>ATINOCYTE_UP                                                                                                       | 80      | 0.492           | 1.838 | 0.007    | 0.006  |
| RUTELLA_RESPONSE_TO_HGF_<br>VS_CSF2RB_AND_IL4_UP                                                                                              | 374     | 0.404           | 1.829 | 0.001    | 0.001  |
| REACTOME_TP53_REGULATES_<br>TRANSCRIPTION_OF_ADDITION<br>AL_CELL_CYCLE_GENES_WHO<br>SE_EXACT_ROLE_IN_THE_P53_<br>PATHWAY_REMAIN_UNCERTAI<br>N | 19      | 0.653           | 1.807 | 0.047    | 0.039  |
| REACTOME_TRANSCRIPTIONA<br>L_REGULATION_BY_TP53                                                                                               | 320     | 0.358           | 1.597 | 0.005    | 0.004  |

**Table S4** miRNA - mRNA interaction network nodes.

|      |       |      |       |
|------|-------|------|-------|
| mRNA | miRNA | mRNA | miRNA |
|------|-------|------|-------|

---

|       |                 |       |                 |
|-------|-----------------|-------|-----------------|
| Casp8 | mmu-miR-466k    | Ulk1  | mmu-miR-302a-5p |
| Casp8 | mmu-miR-466l-5p | Ulk1  | mmu-miR-6383    |
| Casp8 | mmu-miR-466d-5p | Ulk1  | mmu-miR-466l-5p |
| Casp8 | mmu-miR-466i-5p | Ulk1  | mmu-miR-17-5p   |
| Casp8 | mmu-miR-6903-3p | Ulk1  | mmu-miR-20b-5p  |
| Casp8 | mmu-miR-6946-5p | Ulk1  | mmu-miR-93-5p   |
| Casp8 | mmu-miR-466m-3p | Ulk1  | mmu-miR-106a-5p |
| Casp8 | mmu-miR-466o-3p | Ulk1  | mmu-miR-503-3p  |
| Casp8 | mmu-miR-671-5p  | Ulk1  | mmu-miR-3065-3p |
| Casp8 | mmu-miR-465b-5p | Ulk1  | mmu-miR-128-3p  |
| Casp8 | mmu-miR-465c-5p | Ulk1  | mmu-miR-467f    |
| Casp8 | mmu-miR-465a-5p | Ulk1  | mmu-miR-6539    |
| Casp8 | mmu-miR-465d-5p | Ulk1  | mmu-let-7c-1-3p |
| Casp8 | mmu-miR-7665-5p | Ulk1  | mmu-miR-6900-5p |
| Casp8 | mmu-miR-6976-5p | Ulk1  | mmu-miR-669k-3p |
| Casp8 | mmu-miR-7074-5p | Ulk1  | mmu-miR-669h-3p |
| Casp8 | mmu-miR-297c-5p | Ulk1  | mmu-miR-6371    |
| Il1b  | mmu-miR-466l-3p | Ulk1  | mmu-miR-7021-5p |
| Il1b  | mmu-miR-297a-3p | Ulk1  | mmu-miR-3093-3p |
| Il1b  | mmu-miR-669d-3p | Ulk1  | mmu-miR-425-5p  |
| Il1b  | mmu-miR-466e-3p | Ulk1  | mmu-miR-489-3p  |
| Il1b  | mmu-miR-297b-3p | Ulk1  | mmu-miR-6917-5p |
| Il1b  | mmu-miR-466d-3p | Ulk1  | mmu-miR-6903-3p |
| Il1b  | mmu-miR-466a-3p | Ulk1  | mmu-miR-7226-5p |
| Il1b  | mmu-miR-297c-3p | Ulk1  | mmu-miR-350-3p  |
| Il1b  | mmu-miR-467g    | Ulk1  | mmu-miR-3083-5p |
| Il1b  | mmu-miR-3473f   | Ulk1  | mmu-miR-1943-5p |
| Il1b  | mmu-miR-5101    | Ulk1  | mmu-miR-7226-3p |
| Il1b  | mmu-miR-6932-3p | Usp47 | mmu-miR-325-3p  |

|       |                  |       |                  |
|-------|------------------|-------|------------------|
| Il1b  | mmu-miR-26b-3p   | Usp47 | mmu-miR-697      |
| Il1b  | mmu-miR-26a-2-3p | Usp47 | mmu-miR-12187-3p |
| Il1b  | mmu-miR-7039-3p  | Usp47 | mmu-miR-6398     |
| Il1b  | mmu-miR-12187-3p | Usp47 | mmu-let-7a-2-3p  |
| Il1b  | mmu-miR-3099-5p  | Usp47 | mmu-miR-101a-3p  |
| Il1b  | mmu-miR-7064-5p  | Usp47 | mmu-miR-212-5p   |
| Il1b  | mmu-miR-6983-3p  | Usp47 | mmu-miR-466l-3p  |
| Tlr4  | mmu-miR-7027-5p  | Usp47 | mmu-miR-7068-5p  |
| Tlr4  | mmu-miR-7683-3p  | Usp47 | mmu-miR-1960     |
| Tlr4  | mmu-miR-6951-5p  | Usp47 | mmu-miR-138-5p   |
| Tlr4  | mmu-miR-7225-3p  | Usp47 | mmu-miR-340-5p   |
| Tlr4  | mmu-miR-7010-5p  | Usp47 | mmu-miR-1961     |
| Tlr4  | mmu-miR-542-3p   | Usp47 | mmu-let-7k       |
| Tlr4  | mmu-miR-669c-3p  | Usp47 | mmu-let-7e-5p    |
| Tlr4  | mmu-miR-222-5p   | Usp47 | mmu-miR-98-5p    |
| Tlr4  | mmu-miR-331-3p   | Usp47 | mmu-let-7c-5p    |
| Ulk1  | mmu-miR-466i-5p  | Usp47 | mmu-let-7b-5p    |
| Ulk1  | mmu-miR-466d-5p  | Usp47 | mmu-let-7f-5p    |
| Ulk1  | mmu-miR-466k     | Usp47 | mmu-let-7a-5p    |
| Ulk1  | mmu-miR-26b-5p   | Usp47 | mmu-miR-30d-5p   |
| Ulk1  | mmu-miR-26a-5p   | Usp47 | mmu-miR-30c-5p   |
| Ulk1  | mmu-miR-7688-5p  | Usp47 | mmu-miR-30a-5p   |
| Ulk1  | mmu-miR-20a-5p   | Usp47 | mmu-miR-30b-5p   |
| Ulk1  | mmu-miR-106b-5p  | Usp47 | mmu-miR-30e-5p   |
| Ulk1  | mmu-miR-7669-3p  | Usp47 | mmu-miR-384-5p   |
| Casp8 | mmu-miR-466k     | Ulk1  | mmu-miR-302a-5p  |

**Table S5** TFs-mRNA interaction network nodes.

| mRNA | TF | mRNA | TF |
|------|----|------|----|
|------|----|------|----|

|       |        |       |        |
|-------|--------|-------|--------|
| Casp8 | HDAC2  | Tlr4  | NIPBL  |
| Il1b  | GATA4  | Tlr4  | NR3C1  |
| Il1b  | JUNB   | Tlr4  | POLR2A |
| Il1b  | STAT5  | Tlr4  | PPARG  |
| Il1b  | STAT5A | Tlr4  | SPI1   |
| Il1b  | YY1    | Tlr4  | STAT6  |
| Tlr4  | BRD4   | Tlr4  | TET2   |
| Tlr4  | CEBPB  | Usp47 | RNF2   |
| Tlr4  | CREB1  | Usp47 | RYBP   |
| Tlr4  | ELF1   | Usp47 | YY1    |
| Tlr4  | FLI1   | Usp47 | ZFP281 |
| Tlr4  | HDAC1  | Usp47 | ESR2   |
| Tlr4  | IKZF1  | Usp47 | HDAC1  |
| Tlr4  | KDM1A  |       |        |

**Table S6** Drugs - mRNA interaction network nodes.

| mRNA  | drug                                            | mRNA | drug                  |
|-------|-------------------------------------------------|------|-----------------------|
| Casp8 | Tetrachlorodibenzodioxin                        | Il1b | Aluminum Chloride     |
| Il1b  | Lipopolysaccharides                             | Il1b | Asbestos, Crocidolite |
| Il1b  | Dextran Sulfate                                 | Il1b | Benzo(a)pyrene        |
| Il1b  | lipopolysaccharide,<br>Escherichia coli O111 B4 | Il1b | Cadmium Chloride      |
| Il1b  | Acetaminophen                                   | Il1b | Soot                  |
| Il1b  | lipopolysaccharide, E coli<br>O55-B5            | Il1b | Acrylamide            |
| Il1b  | deoxynivalenol                                  | Il1b | Asbestos, Serpentine  |
| Il1b  | Particulate Matter                              | Il1b | Blood Glucose         |
| Il1b  | Tetrachlorodibenzodioxin                        | Il1b | Choline               |
| Il1b  | Cisplatin                                       | Il1b | Croton Oil            |

---

|      |                                                  |      |                                                 |
|------|--------------------------------------------------|------|-------------------------------------------------|
| II1b | Paraquat                                         | II1b | Curcumin                                        |
| II1b | Carbon Tetrachloride                             | II1b | Cyclophosphamide                                |
| II1b | Dexamethasone                                    | II1b | Diclofenac                                      |
| II1b | Trinitrobenzenesulfonic<br>Acid                  | II1b | Dinitrochlorobenzene                            |
| II1b | Dietary Fats                                     | II1b | Doxorubicin                                     |
| II1b | Ethanol                                          | II1b | Dust                                            |
| II1b | lipopolysaccharide, E. coli<br>O26-B6            | II1b | Glucose                                         |
| II1b | sodium arsenite                                  | II1b | Halothane                                       |
| II1b | Zymosan                                          | II1b | Maneb                                           |
| II1b | Air Pollutants                                   | II1b | Methamphetamine                                 |
| II1b | bisphenol A                                      | II1b | Methionine                                      |
| II1b | Bleomycin                                        | II1b | Ovalbumin                                       |
| II1b | Quercetin                                        | II1b | Oxygen                                          |
| II1b | Streptozocin                                     | II1b | perfluorooctanoic acid                          |
| II1b | 1-Methyl-4-phenyl-1,2,3,6-<br>tetrahydropyridine | II1b | Poly I-C                                        |
| II1b | Mustard Gas                                      | II1b | Polysaccharides                                 |
| II1b | Oxazolone                                        | II1b | Rotenone                                        |
| II1b | Ozone                                            | II1b | Silver Compounds                                |
| II1b | Plant Extracts                                   | II1b | Sulfasalazine                                   |
| II1b | Silicon Dioxide                                  | Tlr4 | Lipopolysaccharides                             |
| II1b | titanium dioxide                                 | Tlr4 | lipopolysaccharide,<br>Escherichia coli O111 B4 |
| II1b | 1-Methyl-4-<br>phenylpyridinium                  | Tlr4 | Paraquat                                        |
| II1b | 1-Naphthylisothiocyanate                         | Tlr4 | Carbon Tetrachloride                            |
| II1b | Adenosine Triphosphate                           | Tlr4 | Dextran Sulfate                                 |

---

|      |                                 |      |                          |
|------|---------------------------------|------|--------------------------|
| II1b | Nanotubes, Carbon               | Tlr4 | Dietary Fats             |
| II1b | pirinixic acid                  | Tlr4 | Methamphetamine          |
| II1b | Resveratrol                     | Tlr4 | Ozone                    |
| II1b | T-2 Toxin                       | Tlr4 | bisphenol A              |
| II1b | Tetradecanoylphorbol<br>Acetate | Tlr4 | Dexamethasone            |
| II1b | Toluene 2,4-Diisocyanate        | Ulk1 | Tetrachlorodibenzodioxin |
| II1b | Vehicle Emissions               |      |                          |

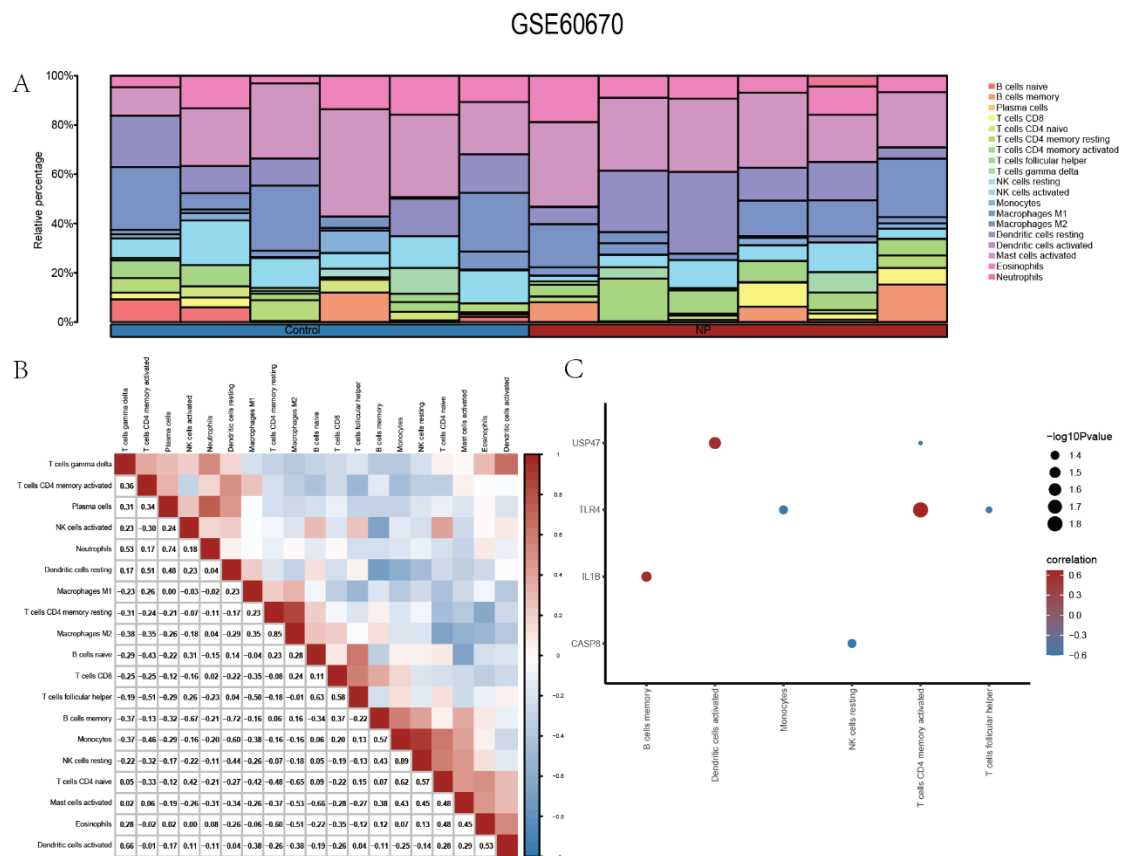

**Figure S1** Immune infiltration analysis of the GSE60670 dataset. A Histogram of immune infiltration of immune cells in the GSE60670 dataset. B Correlation of the abundance of immune cell infiltration in the GSE60670 dataset. C Heat map of immune cell correlations with Co-PRDEGs in the GSE60670 dataset.



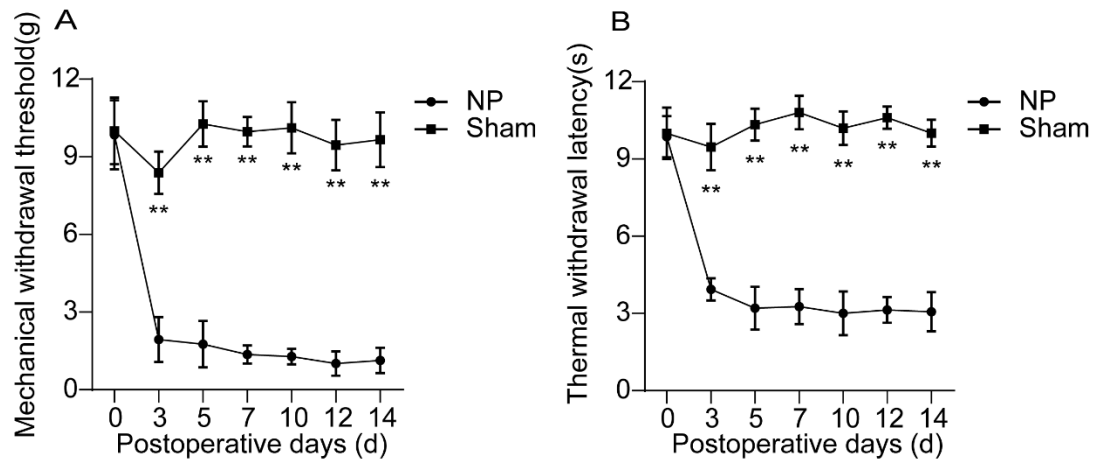

**Figure S2** Pain threshold determination of rats following exposure to the chronic constriction injury (CCI). (A, B) The mechanical withdrawal threshold (MWT) and thermal withdrawal latency (TWL) was measured at 0, 3, 5, 7, 10, 12, 14 days after induction of CCI.  $**P < 0.01$ .
